# Supplementary material for: Characterization of a suspension Vero cell line for viral vaccine production
Source: Research Square preprint supplement (doi:10.21203/rs.3.rs-3590769/v1), 2023-11-25
Supplement: Supplementary file 1 [file 4518a4de52a72d7e4fae70af.docx]

| ID | GO category | Name | FDR | Fold enrichment | Number of genes | Positive or negative enrichment |
| --- | --- | --- | --- | --- | --- | --- |
| GO:0008083 | Molecular function | Growth factor activity | 2.51E-09 | 10.68 | 17/163 | + |
| GO:0005125 | Molecular function | Cytokine activity | 5.25E-08 | 7.85 | 18/235 | + |
| GO:0005126 | Molecular function | Cytokine receptor binding | 2.42E-06 | 6.40 | 17/272 | + |
| GO:0005615 | Cellular component | Extracellular space | 8.96E-04 | 1.85 | 62/3430 | + |
| GO:0005788 | Cellular component | Endoplasmic reticulum lumen | 2.05E-03 | 4.57 | 14/314 | + |
| GO:0071944 | Cellular component | Cell periphery | 2.29E-02 | 1.43 | 90/6460 | + |

**Supplementary Data 3. Significantly enriched gene ontologies (GOs) corresponding to upregulated genes in suspension Vero cells**

Most specific GOs with false discovery rates (FDRs) less than 5% and a number of genes greater than 30 were retained. Only GOs associated with molecular function and cellular component are shown, as GOs associated with biological process were numerous and too general.

**Supplementary Data 4. Cell density three days after passage, depending on the Wnt pathway associated supplement added in the medium.**

The Wnt signaling pathway was activated by adding Wnt3A and DKK1 inhibitor WAY-262611 and inhibited by adding SKL2001. The error bars represent the standard deviation between two different wells.
