# Supplementary material for: Characterization of a suspension Vero cell line for viral vaccine production
Source: Research Square preprint supplement (doi:10.21203/rs.3.rs-3590769/v1), 2023-11-25
Supplement: Supplementary file 2 [file 8d584d15ea51506d2e778e9a.xlsx]

## Sheet: DEG NIS p5vsp25
gene_id	gene_name	logCPM	NIS_p25-vs-NIS_p5,logFC	NIS_p25-vs-NIS_p5,PValue	NIS_p25-vs-NIS_p5,FDR
ENSCSAG00000003185	MMP13	2.14277	-3.93297	0.00021264	0.0109644
ENSCSAG00000014887	VCAN	10.3587	-3.77348	1.10769e-09	2.1982e-06
ENSCSAG00000005826	TAMALIN	2.55544	-3.7068	0.00131531	0.0392449
ENSCSAG00000015052	PTGER2	5.66448	-3.48709	4.47207e-09	4.12479e-06
ENSCSAG00000016849	PDE7B	3.97674	-3.44106	4.10736e-05	0.00338205
ENSCSAG00000007813	SGPP2	2.6194	-3.31183	0.000429311	0.0174718
ENSCSAG00000017952	SLC14A1	2.70155	-3.30375	9.55916e-05	0.00615378
ENSCSAG00000013659	FSTL4	3.56559	-3.21234	0.000514473	0.0199443
ENSCSAG00000016296	CXCR4	4.7391	-3.15895	0.000134167	0.00794289
ENSCSAG00000003876	PPFIA2	4.23789	-3.11865	0.000157846	0.00901421
ENSCSAG00000017630	DACH1	7.16789	-3.11476	1.38265e-06	0.000271972
ENSCSAG00000017206	CDH6	9.13674	-3.01547	1.24169e-09	2.1982e-06
ENSCSAG00000015918	DHRS2	3.40766	-2.92779	5.7108e-07	0.00013187
ENSCSAG00000002671	PLXDC1	2.41194	-2.92415	0.000962082	0.0317367
ENSCSAG00000002733	FAM222A	2.21311	-2.8513	0.000222783	0.0113178
ENSCSAG00000015342	F2RL1	5.23013	-2.75806	4.23284e-05	0.00343216
ENSCSAG00000003198	MMP1	7.95483	-2.68867	2.0945e-06	0.000347622
ENSCSAG00000005111	HABP2	8.68941	-2.54639	6.35658e-06	0.000836697
ENSCSAG00000012727	SLC2A2	4.80804	-2.53269	2.74453e-06	0.000435203
ENSCSAG00000015400	ANOS1	5.12288	-2.50885	0.000171252	0.00947609
ENSCSAG00000010891	CXCL12	4.24905	-2.50433	6.67668e-08	2.53285e-05
ENSCSAG00000007280	SYK	3.29661	-2.48048	0.00143944	0.0415107
ENSCSAG00000012240	PPP2R2B	4.64863	-2.45025	3.11399e-05	0.00273362
ENSCSAG00000019469	ZCCHC12	4.49728	-2.38747	2.5392e-05	0.00240816
ENSCSAG00000017230	CRACDL	3.66482	-2.38746	7.65171e-05	0.00541843
ENSCSAG00000010926	SERPINA1	8.25245	-2.35781	6.46514e-05	0.00480229
ENSCSAG00000005820	GOLGA7B	2.45022	-2.34886	0.00129386	0.0389905
ENSCSAG00000009676	EOMES	4.06987	-2.33949	0.000223756	0.0113178
ENSCSAG00000015167	RIPOR3	4.57725	-2.308	0.000620782	0.0230557
ENSCSAG00000006779	TKTL1	3.97939	-2.282	0.00011505	0.00706393
ENSCSAG00000019583	RTL1	4.50114	-2.2715	7.12565e-07	0.00016104
ENSCSAG00000002872	SELPLG	2.63481	-2.23766	0.000942259	0.0313751
ENSCSAG00000005121	HTATIP2	6.4859	-2.22428	8.56686e-05	0.00575932
ENSCSAG00000001647	OLFML3	5.57089	-2.21797	0.000241163	0.0115911
ENSCSAG00000015859	LRRTM4	3.94239	-2.21794	4.01118e-07	9.90855e-05
ENSCSAG00000018586	GJB2	7.7671	-2.20646	0.000341676	0.0148741
ENSCSAG00000016988	EGFLAM	4.13806	-2.15946	2.15998e-07	6.1844e-05
ENSCSAG00000015067	TCTA	3.4218	-2.11393	0.000530572	0.0204193
ENSCSAG00000013167	HMCN1	4.58594	-2.09647	0.00164993	0.045403
ENSCSAG00000010449	SLC12A1	6.26306	-2.07717	1.07275e-05	0.00122524
ENSCSAG00000014503	CCDC198	3.6573	-2.0555	0.000231045	0.011458
ENSCSAG00000013175	SPNS2	7.60246	-2.02891	2.69339e-07	7.3357e-05
ENSCSAG00000000659	GJB3	5.63883	-2.01576	3.88349e-07	9.82198e-05
ENSCSAG00000009459	SLC24A2	5.88349	2.03722	4.6825e-08	1.98759e-05
ENSCSAG00000008398	TP53I3	6.81461	2.04999	1.30741e-06	0.000262024
ENSCSAG00000002690	TAGLN	5.44012	2.09833	4.82819e-09	4.12479e-06
ENSCSAG00000016761	IL1A	8.21279	2.12456	3.31183e-09	4.12479e-06
ENSCSAG00000015869	VGLL2	4.61388	2.1937	2.98459e-06	0.000454063
ENSCSAG00000004816	DDIT3	5.12366	2.24274	2.52703e-05	0.00240816
ENSCSAG00000004749	CXCL2	2.60988	2.26283	0.00022483	0.0113182
ENSCSAG00000007728	BHLHE41	2.591	2.28656	0.000526144	0.0203226
ENSCSAG00000007377	CSTA	4.48752	2.35271	2.34553e-06	0.000383295
ENSCSAG00000012853	TRIB3	4.65547	2.39686	4.08389e-09	4.12479e-06
ENSCSAG00000000171	NGF	3.54382	2.49729	2.8608e-05	0.00255357
ENSCSAG00000011748	ANGPT1	3.8644	2.50698	2.07436e-06	0.000347622
ENSCSAG00000013500	JPH1	3.06366	2.53118	2.76964e-05	0.00250518
ENSCSAG00000001719	PHGDH	5.67844	2.56402	1.14761e-08	7.17053e-06
ENSCSAG00000014718	ADGRV1	2.38227	2.60801	0.000846307	0.0289051
ENSCSAG00000003200	FSTL5	4.91517	2.65375	1.45136e-08	8.11387e-06
ENSCSAG00000019324	KCNJ11	2.55648	2.74741	0.0012156	0.0375352
ENSCSAG00000015372	LRFN5	3.09431	2.82782	6.87864e-05	0.00507396
ENSCSAG00000015250	G0S2	2.86754	2.86523	0.000129615	0.00777836
ENSCSAG00000007623	CHAC1	5.1139	3.01468	5.60075e-10	1.95453e-06
ENSCSAG00000016756	IL1B	6.66729	3.14483	1.00119e-12	1.06347e-08
ENSCSAG00000003858	SLC6A15	2.57305	3.15564	0.000120489	0.0072718
ENSCSAG00000016665	CCN2	3.59149	3.4659	1.37993e-07	4.72825e-05
ENSCSAG00000000927	ID3	5.45298	3.59307	5.46785e-12	2.90397e-08
ENSCSAG00000019643	FUT1	2.38979	3.91304	0.000318415	0.0140561
ENSCSAG00000004900	INHBE	1.87014	3.9696	0.000592715	0.022405
ENSCSAG00000014039	LCN2	3.17269	4.19282	3.33334e-06	0.00049176
ENSCSAG00000011920	SPINK6	2.43143	4.8247	1.22875e-05	0.00134555
ENSCSAG00000010854	COLEC10	2.77076	4.92654	2.21246e-07	6.1844e-05
ENSCSAG00000004781	CXCL8	4.10599	5.59658	3.77788e-09	4.12479e-06
ENSCSAG00000016614	LGI2	2.09782	5.60788	0.000272818	0.0126545
