# Supplementary material for: Characterization of a suspension Vero cell line for viral vaccine production
Source: Research Square preprint supplement (doi:10.21203/rs.3.rs-3590769/v1), 2023-11-25
Supplement: Supplementary file 3 [file afcc23f5bbcb4e55b726dfbe.xlsx]

## Sheet: Feuil1
ID	GO category	Name	FDR	Fold enrichment	Number of genes	Positive or negative enrichment
GO:0003723	Molecular function	RNA binding	5.00E-09	0.20	11/1666	-
GO:0140513	Cellular component	Nuclear protein-containing complex	1.01E-08	0.17	7/1276	-
GO:0062023	Cellular component	Collagen-containing extracellular matrix	1.24E-08	3.22	39/372	+
GO:0016324	Cellular component	Apical plasma membrane	1.32E-07	3.22	39/372	+
GO:1990904	Cellular component	Ribonucleoprotein complex	5.11E-06	0.09	2/714	-
GO:0019838	Molecular function	Growth factor binding	6.95E-06	5.05	22/134	+
GO:0005615	Cellular component	Extracellular space	8.12E-06	1.44	161/4396	+
GO:0005509	Molecular function	Calcium ion binding	2.14E-05	2.34	56/735	+
GO:0005654	Cellular component	Nucleoplasm	1.62E-04	0.65	87/4130	-
GO:0004984	Molecular function	Olfactory receptor activity	8.84E-04	<0.01	0/441	-
GO:0009986	Cellular component	Cell surface	9.03E-04	1.82	59/995	+
GO:0019866	Cellular component	Transferase complex	1.04E-03	0.29	8/847	-
GO:0005930	Cellular component	Axoneme	1.69E-03	3.29	17/159	+
GO:0005788	Cellular component	Endoplasmic reticulum lumen	1.82E-03	2.54	26/314	+
GO:0016323	Cellular component	Basolateral plasma membrane	1.91E-03	2.79	21/231	+
GO:0140535	Cellular component	Intracellular protein-containing complex	2.10E-03	0.34	10/898	-
GO:0015629	Cellular component	Actin skeleton	2.81E-03	2.11	35/510	+
GO:0050840	Molecular function	Extracellular matrix binding	3.00E-03	6.04	1956-11-01	+
GO:0098978	Cellular component	Glutaminergic synapse	3.11E-03	2.38	26/336	+
GO:0031514	Cellular component	Motile cilium	4.69E-03	2.56	21/252	+
GO:0003779	Molecular function	Actin binding	6.03E-03	2.32	34/451	+
GO:0005903	Cellular component	Brush border	8.44E-03	3.51	12/105	+
GO:0070062	Cellular component	Extracellular exososome	9.70E-03	1.43	98/2100	+
GO:0008201	Molecular function	Heparin binding	1.22E-02	3.18	18/174	+
GO:0005923	Cellular component	Bicellar tight junction	1.23E-02	3.15	13/127	+
		(cell-cell junction, tight junction)
GO:0140640	Molecular function	Catalytic activity, acting on a nucleic acid	1.29E-02	0.20	4/604	-
GO:0008289	Molecular function	Lipid binding	0.0135	1.87	51/837	+
GO:0043679	Cellular component	Axon terminus	1.78E-02	3.18	12/116	+
GO:0005102	Molecular function	Signaling receptor binding	1.97E-02	1.57	82/1602	+
GO:0004714	Molecular function	Transmembrane receptor protein tyrosine kinase activity	1.97E-02	4.96	1962-10-01	+
GO:0005730	Cellular component	Nucleolus	2.00E-02	0.46	15/1002	-
GO:0005759	Cellular component	Mitochondrial matrix	2.13E-02	0.25	4/486	-
GO:0043204	Cellular component	Perikaryon	2.15E-02	2.78	14/155	+
GO:0030425	Cellular component	Dendrite	2.15E-02	1.81	37/629	+
GO:0005796	Cellular component	Golgi lumen	2.23E-02	3.25	11/104	+
GO:0000775	Cellular component	Chromosome, centromeric region	2.25E-02	<0.01	0/236	-
GO:0098686	Cellular component	Hippocampal mossy fiber to CA3 synapse	3.58E-02	5.27	1935-06-01	+
GO:0044304	Cellular component	Main axon	3.64E-02	3.90	1963-08-01	+
GO:0098772	Molecular function	Enzyme regulator activity	3.89E-02	1.61	67/1275	+
GO:0098798	Cellular component	Mitochondrial protein-containing complex	4.02E-02	0.10	1/293	-
GO:0030165	Molecular function	PDZ domain binding	4.17E-02	3.98	1985-11-01	+
GO:0019866	Cellular component	Organelle inner membrane	4.20E-02	0.33	6/560	-
GO:0034358	Cellular component	Plasma lipoprotein particle	4.33E-02	4.98	1937-06-01	+
GO:0005272	Molecular function	Sodium channel activity	4.97E-02	5.34	1946-08-01	+
